# Supplementary material
Source: PubMed Central journal article supplement (PMC4523897)
Supplement: NIHMS697912-supplement.pdf [file NIHMS697912-supplement.pdf]

### **Objective and Self-Reported Sedentary Time**

For accelerometer-measured sedentary time (not graphed), no differences were found in Baltimore, but in Seattle L-L-L and MH-MH-MH differed significantly (484.8 vs. 464.3 min/day,  $p \leq 0.05$ ). For reported sitting time, no significant between-profile differences were found in either region.

### **BMI**

Mean BMI scores differed significantly across profiles with the highest BMI values observed in L-L-L participants (27.0 kg/m<sup>2</sup>) and the lowest observed in MH-MH-MH (25.9 kg/m<sup>2</sup>) and H-H-H (24.8 kg/m<sup>2</sup>) participants. BMI values did not differ across profiles in Baltimore, but did follow an expected pattern, with higher mean BMI values observed in L-L-L participants and lower values observed in HLU-HT-HRA and HID-HRFAR participants.
